# Supplementary material
Source: publisher figshare collection journal article supplement (https://rs.figshare.com/ndownloader/files/44905225)
Supplement: Supplementary file 1 [file 44905225]

No evidence for a role of MHC class II genotype in the chemical encoding of heterozygosity and relatedness in Antarctic fur seals

Jonas Tebbe 1,2,3, Katja Havenstein 4, Jaume Forcada 5, Ralph Tiedemann 4, Barbara Caspers 2,6†, Joseph I. Hoffman 1,3,5,6,7†

1. Department of Evolutionary Population Genetics, Faculty of Biology, Bielefeld University, 33615 Bielefeld, Germany
2. Department of Behavioural Ecology, Bielefeld University, 33501 Bielefeld, Germany
3. Department of Animal Behaviour, Bielefeld University, 33501 Bielefeld, Germany
4. Unit of Evolutionary Biology / Systematic Zoology, Institute of Biochemistry and Biology, University of Potsdam, Potsdam‑Golm, Germany
5. British Antarctic Survey, High Cross, Madingley Road, Cambridge CB3 OET, UK
6. Joint Institute for Individualisation in a Changing Environment (JICE), Bielefeld University and University of Münster, Bielefeld, Germany
7. Center for Biotechnology (CeBiTec), Faculty of Biology, Bielefeld University, 33615 Bielefeld, Germany

† Joint senior authors

Corresponding author: Jonas Tebbe, jonas.tebbe@uni-bielefeld.de, Department of Animal Behaviour, Bielefeld University, 33501 Bielefeld, Germany.

***Abstract (200 words)***

Despite decades of research, surprisingly little is known about the mechanism(s) by which an individual’s genotype is encoded in odour. Many studies have focused on the role of the Major Histocompatibility Complex (MHC) due to its importance for survival and mate choice. However, the salience of MHC-mediated odours compared to chemicals influenced by the rest of the genome remains unclear, especially in wild populations where it is challenging to quantify and control for the effects of the genomic background. We addressed this issue in Antarctic fur seals by analysing skin swabs together with full-length MHC DQB II exon 2 sequences and data from 41 genome-wide distributed microsatellites. We did not find any effects of MHC relatedness on chemical similarity and there was also no relationship between MHC heterozygosity and chemical diversity. However, multilocus heterozygosity showed a significant positive association with chemical diversity, even after controlling for MHC heterozygosity. Our results appear to rule out a dominant role of the MHC in the chemical encoding of genetic information in a wild vertebrate population and highlight the need for genome-wide approaches to elucidate the mechanism(s) and specific genes underlying genotype-odour associations.

***Keywords***

Odour, major histocompatibility complex (MHC), heterozygosity, relatedness, Antarctic fur seal (*Arctocephalus gazella*), pinniped.

*Introduction*

Chemical communication is the oldest and most primitive means of information transfer and underpins many aspects of vertebrate social life, from mate attraction and partner choice through parent-offspring communication to kin recognition [1]. In vertebrates, body odours are complex mixtures of chemicals that are produced either directly for the purpose of olfactory signalling (e.g. secretions of specific scent glands) or indirectly as by-products of metabolic processes [1]. Thus, body odours can act as multidimensional, individual-specific signals that encode diverse information such as sex, age, health, reproductive status and even genotype [2,3].

There is clear evidence from many vertebrate species that individuals are capable of recognising kin using olfactory cues alone [4–7]. The fact that surface chemicals can even be used to identify unfamiliar kin [8] points to the existence not only of individual-specific odours, but also to a covariation between genetic relatedness and olfactory similarity [9]. By implication, genome-wide heterozygosity should also be reflected in an individual’s odour. Much of the variation in genome-wide heterozygosity among individuals within a population occurs due to inbreeding, i.e. the mating of close relatives, which increases the proportion of the genome that is identical by descent [10]. However, “surprisingly little progress” has been made in understanding the link between genotype and odour in vertebrates [11]. This is partly due to the difficulty of disentangling genetic versus environmental sources of variation [12] but also because the small panels of around ten microsatellite loci typical of most studies are often underpowered to detect genetic associations [12] as they provide imprecise estimates of genome-wide heterozygosity (i.e. inbreeding) and relatedness [13].

A major focus of previous studies of the genetic mechanisms underlying olfactory kin recognition has been the major histocompatibility complex (MHC), an extraordinarily diverse cluster of genes that plays a central role in pathogen detection and antigen binding [14,15]. MHC heterozygosity, particularly at the MHC class II genes, often confers a fitness advantage [16,17] by increasing resistance to parasites and pathogens that would otherwise negatively impact key life-history traits such as growth and reproductive success [18–20]. Thus, in order to optimize MHC diversity, many vertebrate species have evolved MHC disassortative mating strategies mediated by MHC-based olfactory recognition mechanisms [14,15]. In line with this, the “MHC peptide hypothesis” argues that specific peptide ligands directly encode olfactory information about MHC genotype [21]. This is supported by several studies that have detected MHC peptides in mouse and human urine [22,23]. Elsewhere, it has been argued that the MHC might influence odour indirectly via the microbiome [24,25] although evidence in support of this hypothesis remains limited [25,26].

Regardless of the exact mechanism by which MHC genotype is chemically encoded, the MHC plays a central role in chemical communication in many species [24,27–32]. Nevertheless, the importance of MHC-mediated odours compared to chemicals influenced by the rest of the genome remains unclear [33–35]. Furthermore, to be useful in the wild, olfactory markers of genetic traits “must be recognisable against the variable genetic and environmental background of normal outbred populations” [11]. Hence studies are needed that analyse the role of the MHC in the context of the genomic background, for example by quantifying and controlling for the effects of background genes [35].

A further complication is that much of our current knowledge about the mechanisms underpinning vertebrate olfactory communication comes from studies of model organisms such as mice [9,34,35]. Most of these studies have been conducted in the laboratory, where the availability of congenic animals and MHC mutants has allowed the effects of the MHC to be separated from the genomic background [36–38]. Furthermore, behavioural experiments and controlled crosses can be performed in a laboratory setting, which allow precise manipulation of an individual’s genotype and the evaluation of behavioural outcomes such as individual recognition and MHC-dependent mate choice [22,37–39]. However, despite these important advantages, laboratory studies of the role of the MHC in odour production and mate choice have not entirely escaped criticism as the use of inbred lineages that differ only at the MHC might introduce experimental artefacts [35]. For example, Wyatt [35] argued that females might choose MHC dissimilar partners simply because the rest of the genome is invariant. Moreover, genetic drift within inbred lines might in some cases have led to the accumulation of small genetic differences in non-MHC regions that may influence odour [34]. For these and other reasons, more naturalistic studies involving outbred populations of non-model species are desirable, but it is even more challenging under these circumstances to quantify and control for the potentially confounding effects of the genomic background [34].

Pinnipeds are well suited to studying chemical communication as they possess large repertoires of functional olfactory receptor genes [40] and are sensitive to even the faintest of odours [41]. Fur seals in particular have a strong musky smell [42] that has been attributed to facial glands which hypertrophy during the breeding season [43,44], and naso-nasal inspection plays an important role in pup recognition [45,46], suggesting that olfactory communication plays an important role in fur seals during the peak reproductive period. In Antarctic fur seals (*Arctocephalus gazella*), chemical fingerprints (otherwise commonly referred to as “odour profiles”, “scent profiles” or “semiochemical profiles”) robustly and repeatably encode various information that could be important for kin recognition, including colony membership and mother-offspring similarity [12,47]. Furthermore, heterozygosity is known to be positively associated with chemical diversity, defined as the total number of substances in an individual’s chemical fingerprint [12]. However, the potential involvement of the MHC in the chemical encoding genetic information in fur seals remains to be investigated.

Here, we addressed this question by combining previously published chemical data and 41-locus microsatellite genotypes from Stoffel et al. [12] with MHC class II DQB exon 2 sequences [48]. Given that MHC class II genes have been implicated in survival and disease susceptibility in pinnipeds [49–51] and the MHC class II DQB exon 2 shows evidence of balancing selection and trans-species polymorphism in Antarctic fur seals [48], we hypothesised that this locus may be involved in the chemical encoding of genetic information in this species. Specifically, we hypothesised that (i) individuals with more similar MHC genotypes should be more similar in their chemical fingerprints; (ii) MHC heterozygotes should have higher chemical diversity than MHC homozygotes; and (iii) these hypothesised associations might only become apparent after controlling for the potentially confounding effects of relatedness and genome-wide heterozygosity respectively. We furthermore hypothesised that (iv) variation in chemical fingerprints among individuals may be associated with the possession of different MHC genotypes and / or alleles.

***Methods***

*(a) Field methods*

Chemical and genetic samples were analysed from a total of 88 Antarctic fur seals (44 mother-offspring pairs) during the 2011 / 2012 field season on Bird Island, South Georgia (54°00’24.8ʺ S, 38°03’04.1ʺ W). Sampling was carried out at two breeding colonies (Figure 1): “Freshwater beach” (FWB) and the “Special study beach” (SSB), which are separated by around 200m [52]. Chemical samples were collected by rubbing the cheeks of the animals with sterile cotton wool swabs and stored individually in 60% ethanol at –20°C. Tissue samples were taken from the foreflipper using piglet ear notching pliers and stored at –20°C in 20% dimethyl sulphoxide saturated with salt [53].

*(b) Chemical analysis*

The chemical samples were subjected to gas chromatography–mass spectrometry (GC-MS) as described by Stoffel et al. [12]. The resulting chemical data were then quality checked and corrected for minor retention shifts using “GCalignR” as described by Ottensmann et al. [54]. After log(x+1) transforming the chemical data, we used “vegan” [55] to calculate pairwise chemical dissimilarity using Bray-Curtis values, which were then converted to pairwise chemical similarity values by subtracting them from one. Chemical diversity was calculated as the total number of substances in each individual’s chemical fingerprint [12].

*(c) Genetic analysis*

Total genomic DNA was extracted and genotyped at 43 microsatellites (41 of which conformed to Hardy-Weinberg equilibrium and were retained for analysis) as described by Stoffel et al. [12]. Individual standardized multilocus heterozygosity (sMLH) and pairwise relatedness were quantified using “inbreedR” [56] and “Demerelate” [57] respectively. We also used inbreedR to calculate *g*2, a measure of the extent to which heterozygosity is correlated across loci, and to derive its 95% confidence interval through 1000 permutations of the microsatellite dataset. Subsequently, intronic primers were designed to PCR amplify the full-length second exon of the MHC DQB II locus, which was multiply cloned and sequenced in each individual as described by Tebbe et al. [48]. From an initial sample set of 88 individuals, PCR products were obtained for 56 individuals, resulting in a dataset of 771 full-length DQB exon 2 sequences (mean = 13.8, range = 7 – 32 sequences per individual). Some of these samples could not be successfully sequenced due to small amounts of DNA being available, low yields of PCR products despite multiple attempts, and the cloning not producing interpretable sequences for all of the samples. As the MHC DQB II locus appears not to be duplicated and conforms to Mendelian inheritance in Antarctic fur seals [48], we calculated MHC heterozygosity (1 = heterozygous, 0 = homozygous) and used “phyloseq” [58] to quantify pairwise MHC relatedness as 1 - UniFrac distance. UniFrac distances allowed us to incorporate phylogenetic distances of the MHC DQB exon 2 alleles based on an already existing tree [48] by calculating fractions of unshared branch lengths between pairs.

*(d) Statistical analysis*

To evaluate the contribution of the MHC towards the chemical encoding of genetic information in Antarctic fur seals, we fitted multiple linear mixed effect models in R [59]. Specifically, we used a multi-model framework to test for the effects of genetic predictor variables on chemical similarity and chemical diversity respectively. The implemented models are shown below:

| Model a1: | Chemical similarity ~ MHC relatedness + Colony membership + Age + (1|family) + (1|pair ID1) + (1|pair ID2) |
| --- | --- |
| Model a2: | Chemical similarity ~ Microsatellite relatedness + Colony membership + Age + (1|family) + (1|pair ID1) + (1|pair ID2) |
| Model a3: | Chemical similarity ~ MHC relatedness + Microsatellite relatedness + Colony membership + Age + (1|family) + (1|pair ID1) + (1|pair ID2) |
| Model a4: | Chemical similarity ~ Colony membership + Age + (1|family) + (1|pair ID1) + (1|pair ID2) |
| Model b1: | Chemical diversity ~ MHC heterozygosity + Colony membership + Age + (1|family) |
| Model b2: | Chemical diversity ~ sMLH + Colony membership + Age + (1|family) |
| Model b3: | Chemical diversity ~ MHC heterozygosity + sMLH + Colony membership + Age + (1|family) |
| Model b4: | Chemical diversity ~ Colony membership + Age + (1|family) |

For the models of chemical similarity, colony membership was a fixed effect with two levels (same versus different colony), age was a fixed effect with two levels (same versus different age class) and family was a random effect with two levels (same versus different family). The identities of both individuals being compared were also included as random effects (pair ID1 and pair ID2 respectively). For the models of chemical diversity, colony membership and age were similarly fitted as fixed effects with two levels (FWB versus SSB and mother versus pup respectively). We also included family ID as a random effect in these models. Although we controlled for age in the above models, we also repeated these models separately for mothers and pups, excluding age and family as covariates.

We used the R package “performance” [60] to identify the best performing models. Performance uses a weighted approach that incorporates multiple ranking criteria (AIC, AICc, BIC, conditional and marginal *r*2, ICC, RMSE, σ) in the model selection procedure while including random effects. As an additional check, we also used the “dredge” function in “MuMln” [61] in conjunction with partial *r*² values of each combination of fixed effects, calculated with “partR2” [62]. However, this approach only uses AIC for model selection and it also excludes random effects. The quality of model fit was also assessed using residual and q-q plots.

After identifying the best performing models of chemical similarity and chemical diversity, we implemented bootstrap analyses to evaluate the uncertainty associated with our effect size estimates. Specifically, we randomly selected 1000 bootstrap samples of 800 pairwise values for the chemical similarity model and 30 individual values for the chemical diversity model and then calculated partial *r*² values to extract the effect sizes of MHC relatedness, microsatellite relatedness, MHC heterozygosity and sMLH.

Next we used a stepwise decomposition of Bray-Curtis similarities (SIMPER) to identify a subset of chemicals that maximised chemical similarity between all pairs of individuals in the dataset. SIMPER calculates similarity percentage values that reflect the contribution of each chemical towards overall pairwise Bray-Curtis similarity. After visual inspection of the cumulative curve depicting the percentage similarity contributions of the chemicals from the highest to lowest contributions, we selected a subset of 15 chemicals that maximised the slope while explaining over 35% of the total variation. We then re-ran the models of chemical similarity described above to test for an association between MHC relatedness and chemical similarity at this subset of chemicals.

Finally, we tested for chemical differences between mothers and pups, between the two colonies, among different MHC genotypes and in relation to the presence / absence of specific MHC alleles using non-parametric permutational multivariate analyses of variance (PERMANOVA). For non-normally distributed pairwise data, this approach tests for within- and among-group differences in the centroids and dispersion of pre-defined groups, in our case based on Bray-Curtis similarity values. Statistical significance was computed based on 9999 permutations of the data. All analyses were performed using a combination of standard functions in vegan and custom scripts in R.

***Results***

To test for the possible involvement of the MHC in the chemical encoding of genetic information in Antarctic fur seals, we combined GC-MS and microsatellite data [12] with MHC class II DQB exon 2 sequences [48] from 56 individuals, comprising 32 mothers and 24 pups. The number of chemicals per individual averaged over the entire dataset was 55.9 ± 2.8 (Supplementary table 1) and no significant differences in chemical diversity were found between mothers and pups or between the two colonies (ANOVA, age: *F*1, 52 = 0.13, *p* = 0.72; colony: *F*1, 52 = 0.27, *p* = 0.609; age*colony: *F*1, 52 = 3.46, *p* = 0.068). However, testing for group differences with PERMANOVA, we found that chemical similarity was significantly affected by an individual’s colony of origin (Pseudo-*F*1, 1= 11.47, *p* = 0.001) and by family (Pseudo-*F*1, 34= 1.73, *p* = 0.001), but not by age class (Pseudo-*F*1, 55= 1.09, *p* = 0.330). The two‐locus heterozygosity disequilibrium estimator was positive and significant (*g*2 =0.0039, 95% CI = 0.005–0.0073, *p* = 0.008), indicating that the 41 microsatellites capture genome-wide variation in inbreeding. We identified a total of 19 MHC alleles and 37 distinct MHC genotypes. Relatedness at the MHC was weakly but significantly associated with microsatellite relatedness (*F*1, 923 = 4.55, *p* = 0.033) but no association was found between MHC heterozygosity and sMLH (*F*1, 52 = 1.45, *p* = 0.233).

*Model selection*

We used a model comparison approach implemented in the “performance” package to identify the best performing models of chemical similarity and chemical diversity based on a weighted comparison of multiple model performance measures (see Methods for details). When all of the animals were analysed together, the best model of chemical similarity did not include any main genetic effects (model a4, Table 2a, Supplementary table 2a). Specifically, chemical similarity was not significantly associated with neither MHC relatedness (Figure 2a) nor microsatellite relatedness (Figure 2b). The best performing (null) model only included colony and age as fixed effects, as previously found by Stoffel et al. [12] and Tebbe et al. [47]. The best model of chemical diversity (model b2, Table 1b) included only sMLH as a fixed genetic effect (*p* = 0.003, Figure 2c, Supplementary table 2b) while no effects of MHC heterozygosity on chemical diversity were found (Figure 2d). Similar results were obtained when the mothers and pups were analysed separately (Supplementary tables 3 and 4).

As an additional check, we also used the “dredge” function of the MuMln package for model selection. In support of the results described above, the best model of chemical similarity contained only colony as a fixed effect (Supplementary table 5). The best performing model of chemical diversity contained not only sMLH but also MHC heterozygosity as fixed genetic effects (Supplementary table 6). However, the goodness of fit of this model was virtually identical to that of a model containing only sMLH as a fixed effect (partial *r*2 = 0.1168 versus 0.1166, Supplementary table 6). This difference is marginal bearing in mind that dredge only uses a single performance criterion for model selection and does not account for random effects.

To quantify the uncertainty in our effect size estimates, we used a bootstrapping approach as described in the Materials and methods. For the best supported model of chemical similarity, the effect size distributions of both MHC relatedness and microsatellite relatedness were tightly centred around zero (Figure 3), providing further evidence for a lack of any obvious genetic effects on chemical similarity. For the best supported model of chemical diversity, the 95% confidence interval of the effect size distribution of MHC heterozygosity also overlapped zero, although there was a tail of positive bootstrapped *r*2 values, whereas sMLH had a clearly positive effect size distribution centred around an *r*2 value of approximately 0.16 with a 95% confidence interval that did not overlap zero.

*Controlling for the genomic background*

To test for any effects of the MHC that might be masked by the genomic background, we compared the model of chemical similarity containing only MHC relatedness as a main genetic effect (model a1) with the equivalent model containing both MHC relatedness and microsatellite relatedness (model a3). In neither model was a significant effect of MHC relatedness found (Supplementary table 2a). Similarly, we compared models of chemical diversity containing only MHC heterozygosity (model b1) and both MHC heterozygosity and sMLH (model b3). Again, no significant effects of the MHC were detected in either model (Supplementary table 2b) although reassuringly, the effect of sMLH remained statistically significant (*p* = 0.003) even after controlling for MHC heterozygosity.

*Testing for MHC effects on specific chemicals*

In order to decrease the complexity of our data and to minimise the noise contributed by large numbers of chemicals that do not substantially contribute towards overall chemical similarity, we used a stepwise decomposition of Bray-Curtis similarities (SIMPER). This approach allowed us to identify a specific subset of substances that contributed the most towards the total variation in chemical similarity between all pairs of individuals in the dataset. A cumulative plot of the proportional contribution of each chemical towards Bray-Curtis similarity identified 15 substances that together accounted for over 35% of the variation in chemical similarity (Supplementary figure 2). Repeating the model of chemical similarity based only these substances produced virtually identical results to those described above (Supplementary tables 7 and 8).

*Testing for genotype- and allele-specific effects of the MHC*

Finally, we tested for more subtle effects of the MHC on chemical fingerprints using a PERMANOVA framework. First, we tested for chemical differences among the 37 different MHC genotypes. We found that MHC genotype did not explain a significant proportion of the total chemical variation (Pseudo-*F*1,36 = 1.08, *p* = 0.17, Supplementary figure 1). Second, we tested for chemical differences among individuals in relation to the presence / absence of the 19 different MHC alleles. Again, we could not detect any significant effects after table-wide FDR correction for multiple tests (Supplementary table 9).

***Discussion***

Due to its central role in fitness and mate choice, the MHC has been a major focus of studies of chemical communication in vertebrates [14,15]. However, interpreting associations between MHC genotype and odour is not always straightforward, especially given that few studies are able to quantify and control for the genomic background, especially in natural populations of non-model organisms [33–35]. Here, we investigated the role of the MHC in encoding chemical similarity and diversity in a wild population of Antarctic fur seals. Using a multi-model statistical framework, we found that the best model of chemical similarity did not include any genetic effects, while the best model of chemical diversity included only multilocus heterozygosity. Our findings suggest that information about an individual’s genotype may be chemically encoded in fur seals via mechanism(s) that do not involve the MHC.

Mate choice experiments have shown that many species, including humans, are able to discriminate the body odours of individuals based on their MHC genotype [63,64]. However, relatively little is known about the mechanism(s) by which MHC genes influence individual odours. One possibility is that MHC genotype has a direct influence on odour due to the presence of degradation products of MHC molecules and / or secondary metabolites of biochemical pathways modulated by the MHC [39,65]. Alternatively, MHC genotype might indirectly influence odour by mediating the interaction between the host immune system and odour-producing bacteria [24,33]. The former mechanism predicts a positive relationship between MHC similarity and chemical similarity, as well as higher chemical diversity in MHC heterozygotes compared to MHC homozygotes. By contrast, a negative relationship between MHC heterozygosity and chemical diversity might be expected if MHC heterozygotes were better able to suppress bacterial diversity [66].

Our results are not consistent with either of these mechanisms, as we were unable to detect any effects of the MHC on chemical similarity or diversity, regardless of whether we tested for relationships in isolation or after controlling for the genomic background. Broadly speaking, our results stand in contrast to several recent studies of wild vertebrate populations reporting links between the MHC and odour [67–71]. However, in support of our results, Slade et al. [69] also found no relationship between MHC heterozygosity and the chemical diversity of preen wax in song sparrows, even though chemical distance was associated with MHC dissimilarity in male-female but not same sex dyads. Furthermore, Setchell et al. [68] did not find odour differences among mandrills carrying different MHC supertypes, although MHC similarity and chemical similarity were correlated. Moreover, associations between the MHC and odour often appear to be context-dependent, varying for example by sex or breeding status [67,69,70]. However, there is no indication of strong context-dependence in our study as comparable results were obtained for breeding females and offspring.

There is a growing appreciation of the need to incorporate the potentially confounding effects of the genomic background into MHC studies, especially in natural populations [33–35]. For example, MHC heterozygosity can correlate with genome-wide heterozygosity when there is inbreeding within a population [72], which could potentially lead to effects of MHC heterozygosity being confounded by inbreeding and *vice versa*. However, it is challenging to incorporate the effects of the genomic background into studies of wild populations, where genomic resources are often lacking and characterising and sequencing the MHC already requires a considerable investment of time and resources. Fortunately, a two-decade long genetic study of Antarctic fur seals [73] has provided us with the tools to genotype a sufficiently large number of microsatellites to capture a clear signal of identity disequilibrium, which gives us a reasonable degree of confidence that MHC heterozygosity and inbreeding are uncorrelated. This lack of association is arguably to be expected given that the MHC DQB II exon 2 shows evidence of being under balancing selection in Antarctic fur seals [48], while diversity across the rest of the genome is known to be strongly influenced in this species by genetic drift during a historical bottleneck [74–76] and inbreeding depression [73,77–79] These contrasting selective pressures could result in patterns of diversity at the MHC becoming dissociated from patterns of diversity across the rest of the genome.

The MHC did not feature in any of the top models of chemical similarity or chemical diversity, no effects of the MHC were found after controlling for the genomic background, and no chemical associations were found with specific MHC genotypes or alleles. However, we focussed on broad patterns so cannot rule out the possibility of one or a small number of chemicals being affected by the MHC. Nevertheless, our results are clearly at odds with previous studies reporting systemic effects of the MHC on odour [68–71]. By contrast, we found a highly significant positive relationship between heterozygosity and chemical diversity, as previously reported by Stoffel et al [12], which suggests the inbreeding is encoded in Antarctic fur seal chemical fingerprints. Consequently, the lack of any obvious parallel effects of the MHC points towards one or more, as yet unknown mechanism(s), being involved in the chemical encoding of inbreeding.

How might inbreeding be chemically encoded if not via the MHC? We can envisage a number of possibilities. Chiefly among them, several studies have shown that inbreeding alters the expression of tens to hundreds of genes, including those involved in metabolism, stress responses, inflammation and immunity [80,81]. These alterations to an organism’s physiology might result in systematic chemical changes that could alter patterns of chemical diversity. Alternatively, inbreeding might indirectly influence chemical diversity by changing microbial alpha diversity. In line with this, we have previously shown that heterozygous fur seals carry less diverse skin microbiota [66]. This is in line with the leash model of host control, which argues that better quality individuals should be more effective at keeping their microbiome “on a leash” [82]. In the context of Antarctic fur seals, a negative relationship between heterozygosity and microbial diversity would then argue for outbred individuals being more capable of suppressing non-beneficial microbes, possibly due to higher levels of immunogenetic diversity [66]. However, it is unclear how a reduction in microbial diversity could lead to increased chemical diversity.

One potential criticism of our study is that we focused on a single MHC class II locus and did not investigate the possible involvement of MHC class I genes. However, the MHC DQB II exon 2 is the most obvious candidate to investigate in Antarctic fur seals for three reasons. First, MHC class II genes are involved in the presentation of extracellular pathogens such as bacteria to the immune system [83]. Given that host microbial communities have been implicated in the generation of host odours via the fermentation hypothesis [84,85], a focus on MHC class II genes therefore seems justified. Second, MHC DQB II exon 2 genotype has previously been linked to offspring survival [49] and habitat specific selection [86] in a closely related pinniped species, the grey seal. Third, the MHC DQB II exon 2 is known to be expressed in Antarctic fur seals [87] and the putative antigen binding sites encoded by this locus show patterns of amino acid divergence consistent with balancing selection and trans-species polymorphism [48]. Nevertheless, our MHC haplotypes are only 267 base pairs long and they do not span multiple MHC loci, which would be desirable for a more complete characterisation of the effects of the MHC on odour. While this represents an interesting potential future research avenue, gathering long-range haplotype information is non-trivial in wild populations due to the technical difficulty and cost of sequencing and phasing multiple loci in non-model organisms.

There is also the question of whether our sample size of 56 individuals is sufficiently large to detect effects of MHC genotype on odour. To interpret the results of tests with non-significant results, biologists often advocate *post hoc* power analyses. However, the approach of calculating the observed power given the value of a test statistic is flawed because there is a one to one relationship between the *p*‐value and the power to reject the null hypothesis of no effect [88–91]). A better alternative is to present effect sizes together with their 95% CIs, which are influenced by both sample size and the variance of the data, and which therefore provide an indication of the likelihood of the true effect size being zero [88–91]). Bootstrapping our dataset over individuals revealed that the 95% CIs of the effect size distributions of MHC relatedness and microsatellite relatedness on chemical similarity were both tightly centred around zero. The 95% CI of the effect size distribution of MHC heterozygosity on chemical diversity also overlapped zero, although a minority of the bootstrapped datasets produced positive *r*2 values. By contrast, the bootstrapped effect size distribution of the relationship between sMLH and chemical diversity was clearly positive with a 95% CI that did not overlap zero. These results allow us to conclude with a reasonably high degree of confidence that there is no association between MHC relatedness and chemical similarity in our dataset. However, we prefer to be a little more circumspect about the lack of a relationship between MHC heterozygosity and chemical diversity, where a larger sample size of individuals (and in particular the inclusion of more MHC homozygotes) would improve the resolution of the effect size distribution. However, a simple comparison of the empirical effect sizes of MHC heterozygosity and sMLH suggests that, if present, any effect of MHC heterozygosity on chemical diversity would likely be orders of magnitude smaller than the effect of sMLH, which again argues for a genome-wide effect.

Another potential criticism of our study is that behavioural variation, especially in the amount of time animals spend at sea, might potentially confound our results. However, Antarctic fur seal mothers give birth and provision their pups ashore for several days before they first leave on a foraging trip [92] and they are also site faithful both within and between seasons [93]. The pups also move very little during the first twenty days of life [94] and their natal coat lacks the water-repellent properties of adult fur, preventing them from spending prolonged periods of time at sea [95]. Hence, behavioural variation in the context of our study is rather limited. In line with this, sMLH shows a strong association with chemical diversity and, more generally, chemical patterns in Antarctic fur seals are highly repeatable among years and across different contexts [47] which would not be expected if there were strong confounding effects of individual variation in behaviour.

Finally, although we deployed substantially more microsatellites than is usually possible, genomic approaches such as reduced representation sequencing would undoubtedly enhance the resolution of inbreeding [96]. Nonetheless, our genetic dataset carries a clear signature of identity disequilibrium, indicating that 41 microsatellites is adequate to capture genome-wide variation in inbreeding in Antarctic fur seals. We also found a significant positive relationship between sMLH and chemical diversity, implying that outbred individuals possess more diverse chemical fingerprints. Overall, our genetic resolution is therefore sufficient to detect strong, genome-wide relationships, although future studies using higher resolution approaches based on larger numbers of single nucleotide polymorphisms would represent a marked improvement by allowing genome-wide scans for loci or genomic regions that influence animal odours.

In summary, our study lends further support to existing arguments for broadening the focus of chemical studies beyond the MHC [33–35]. In particular, although it may be pragmatic to focus on specific MHC genes, our limited understanding of the broader context, both in relation to other MHC loci and to the rest of the genome, could be problematic. We would like to see the next generation of chemical studies incorporating approaches capable of screening larger numbers of genome-wide distributed loci. This is becoming increasingly feasible thanks to the development of cost-effective genotyping approaches such as reduced representation sequencing, the increasing availability of single nucleotide polymorphism arrays, and the falling costs of whole genome resequencing. An alternative and complementary approach would be to link patterns of gene expression to chemical differences among individuals in order to identify candidate genes whose expression levels correlate with chemical diversity and / or similarity. In principle, these and related approaches should even allow us to go beyond searching for broad associations to identifying the specific genes responsible for chemical differences among individuals.

***Ethics***

Sampling was carried out by the British Antarctic Survey under permits from the Government of South Georgia and the South Sandwich Islands (Wildlife and Protected Areas Ordinance (2011), RAP permit numbers 2018/024 and 2019/032). The samples were imported into the UK under permits from the Department for Environment, Food and Rural Affairs (Animal Health Act, import license number ITIMP18.1397) and from the Convention on International Trade in Endangered Species of Wild Fauna and Flora (import numbers 578938/01-15 and 590196/01-18). All procedures used were approved by the British Antarctic Survey Animal Welfare and Ethics Review Body (AWERB applications 2018/1050 and 2019/1058).

***Data availability statement***

Microsatellite, MHC class II DQB exon 2 genotypes and chemical fingerprint alignments can be accessed via Zenodo (https://doi.org/10.5281/zenodo.7741581). Sequences of the 19 MHC alleles are available on Genbank (accession numbers ON060886–ON060904). The code used to analyse the data and accompanying documentation are available as a PDF file written in Rmarkdown (electronic supplementary material, File S1, <https://doi.org/10.5281/ zenodo.7741581> or https://github.com/tebbej/arga_mhc_scent_corr).

***Acknowledgements***

We thank Tobias Lenz and Artemis Efstratiou for their help interpreting the results of the MHC sequencing. This work contributes to the Ecosystems project of the British Antarctic Survey, Natural Environmental Research Council, and is part of the Polar Science for Planet Earth Programme.

***Author contributions***

JIH, BAC and JF conceived the study and contributed funding and materials. JT, JIH and BAC analysed the data. JT and JIH drafted the manuscript and all of the authors commented on and approved the final manuscript.

***Funding***

This research was funded by the Deutsche Forschungsgemeinschaft (DFG, German Research Foundation) in the framework of a Sonderforschungsbereich (NC3 project numbers 316099922 and 396774617–TRR 212) and the priority programme “Antarctic Research with Comparative Investigations in Arctic Ice Areas” (project number 424119118). It was also supported by core funding from the Natural Environment Research Council to the British Antarctic Survey’s Ecosystems Program. This work contributes to the Ecosystems project of the British Antarctic Survey, Natural Environmental Research Council, and is part of the Polar Science for Planet Earth Programme. Parts of this study have been funded by the Volkswagen Foundation through a Freigeist Fellowship to BAC.

***Declaration of AI use***

The authors declare no use of AI-assisted technology in creating this article.

***Competing interests***

The authors declare no competing interests.

***Figure legends***

**Figure 1**: Map of Bird Island, South Georgia showing the geographical locations (grey) of two Antarctic fur seal breeding colonies, the Special study beach and Freshwater beach.

**Figure 2**: Relationship between genetic variation at the MHC and microsatellites and chemical variation in Antarctic fur seals. (a) The relationship between pairwise MHC UniFrac distance and chemical similarity (model a1, not significant); (b) The relationship between genetic relatedness at 41 microsatellite loci and chemical similarity (model a2, not significant); (c) The relationship between microsatellite heterozygosity (sMLH) and chemical diversity (model b2, *F*1,44 = 4.55, *p* < 0.05); (d) Differences in chemical diversity (defined as the number of chemicals in an individual’s chemical fingerprint) between MHC homozygotes and MHC heterozygotes (model b1, not significant). The box plots show the median and interquartile range, with the whiskers indicating the 95% confidence intervals. Linear regressions and associated 95% confidence intervals are only shown for the significant relationship between chemical diversity and sMLH.

**Figure 3:** Bootstrapped partial *r*² values for the fixed effects of the models. The plot shows 1000 bootstrapped data points for each of the four main genetic effects evaluated in the models – MHC relatedness, microsatellite relatedness, sMLH and MHC heterozygosity. The box plots show the medians and interquartile ranges, with the whiskers indicating the 95% confidence intervals.

***Figures***

Figure 1


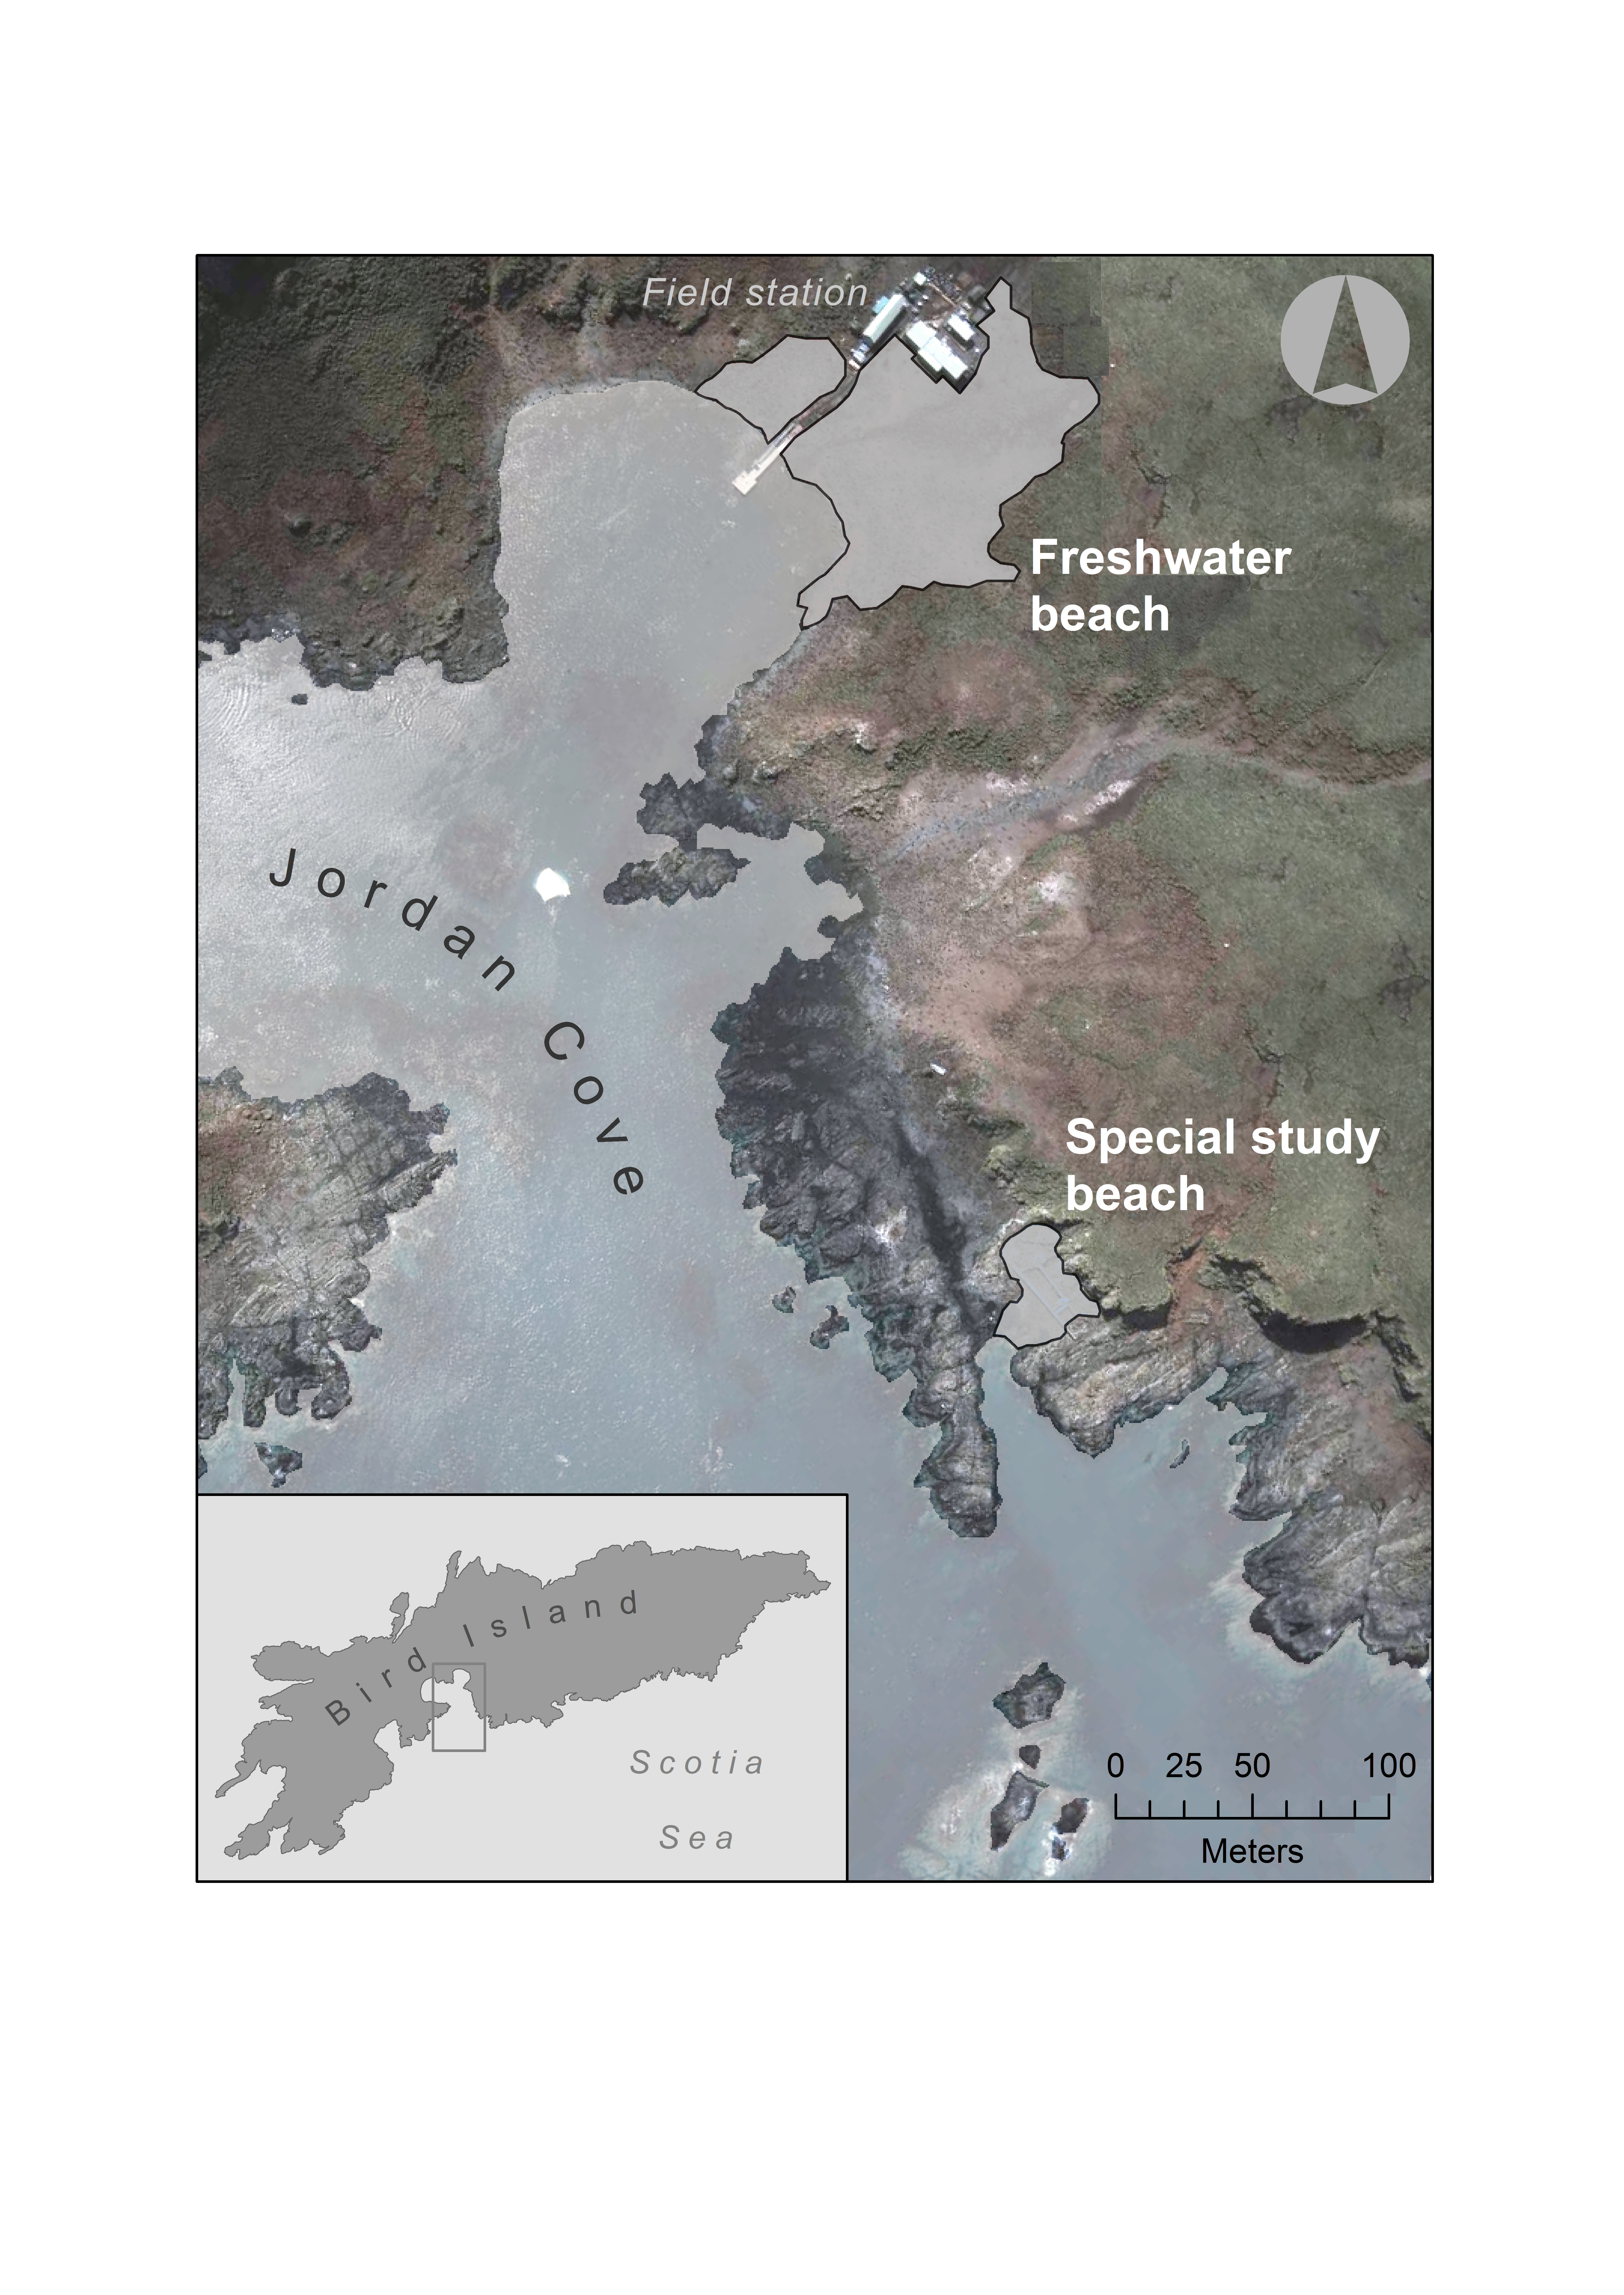


Figure 2


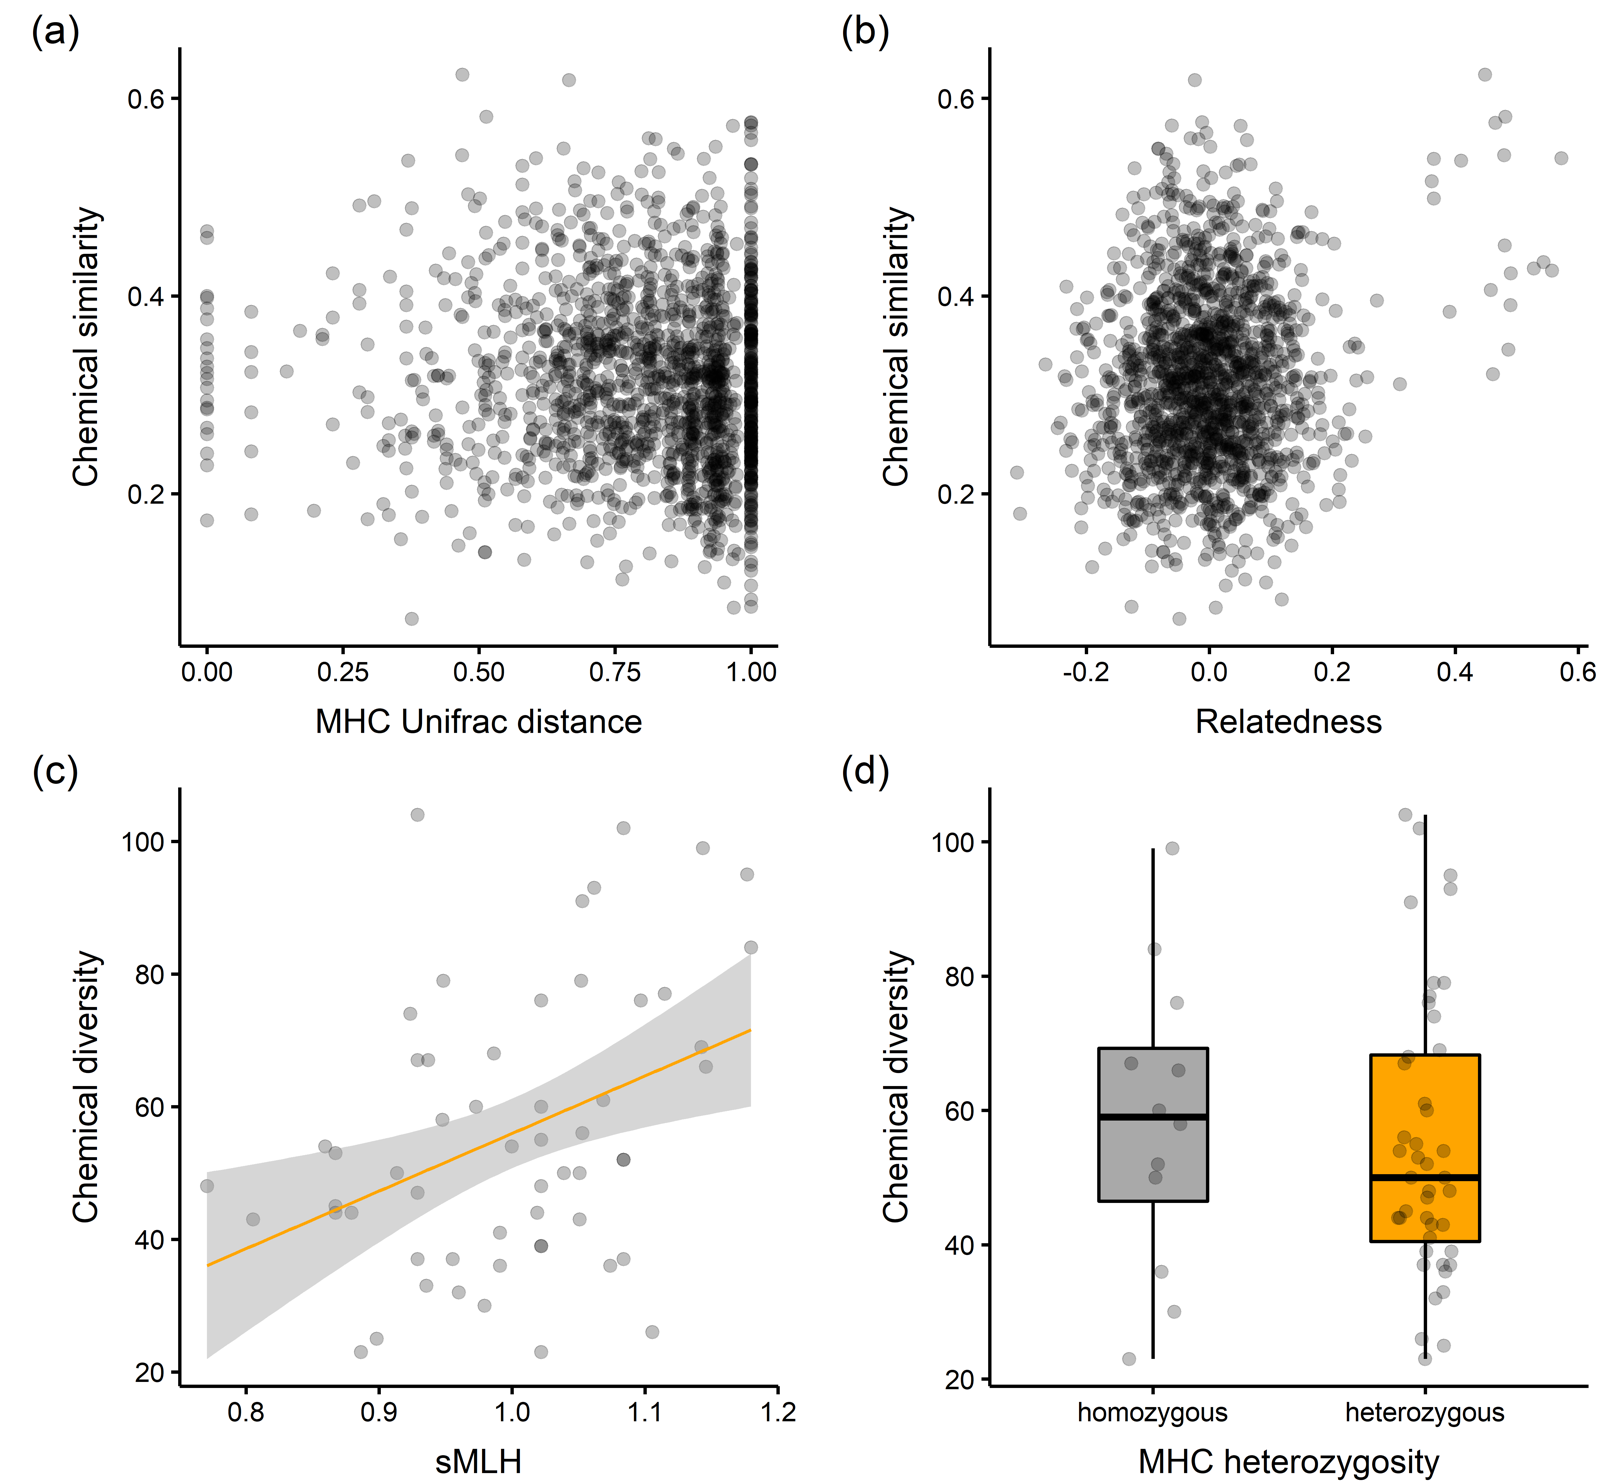


Figure 3


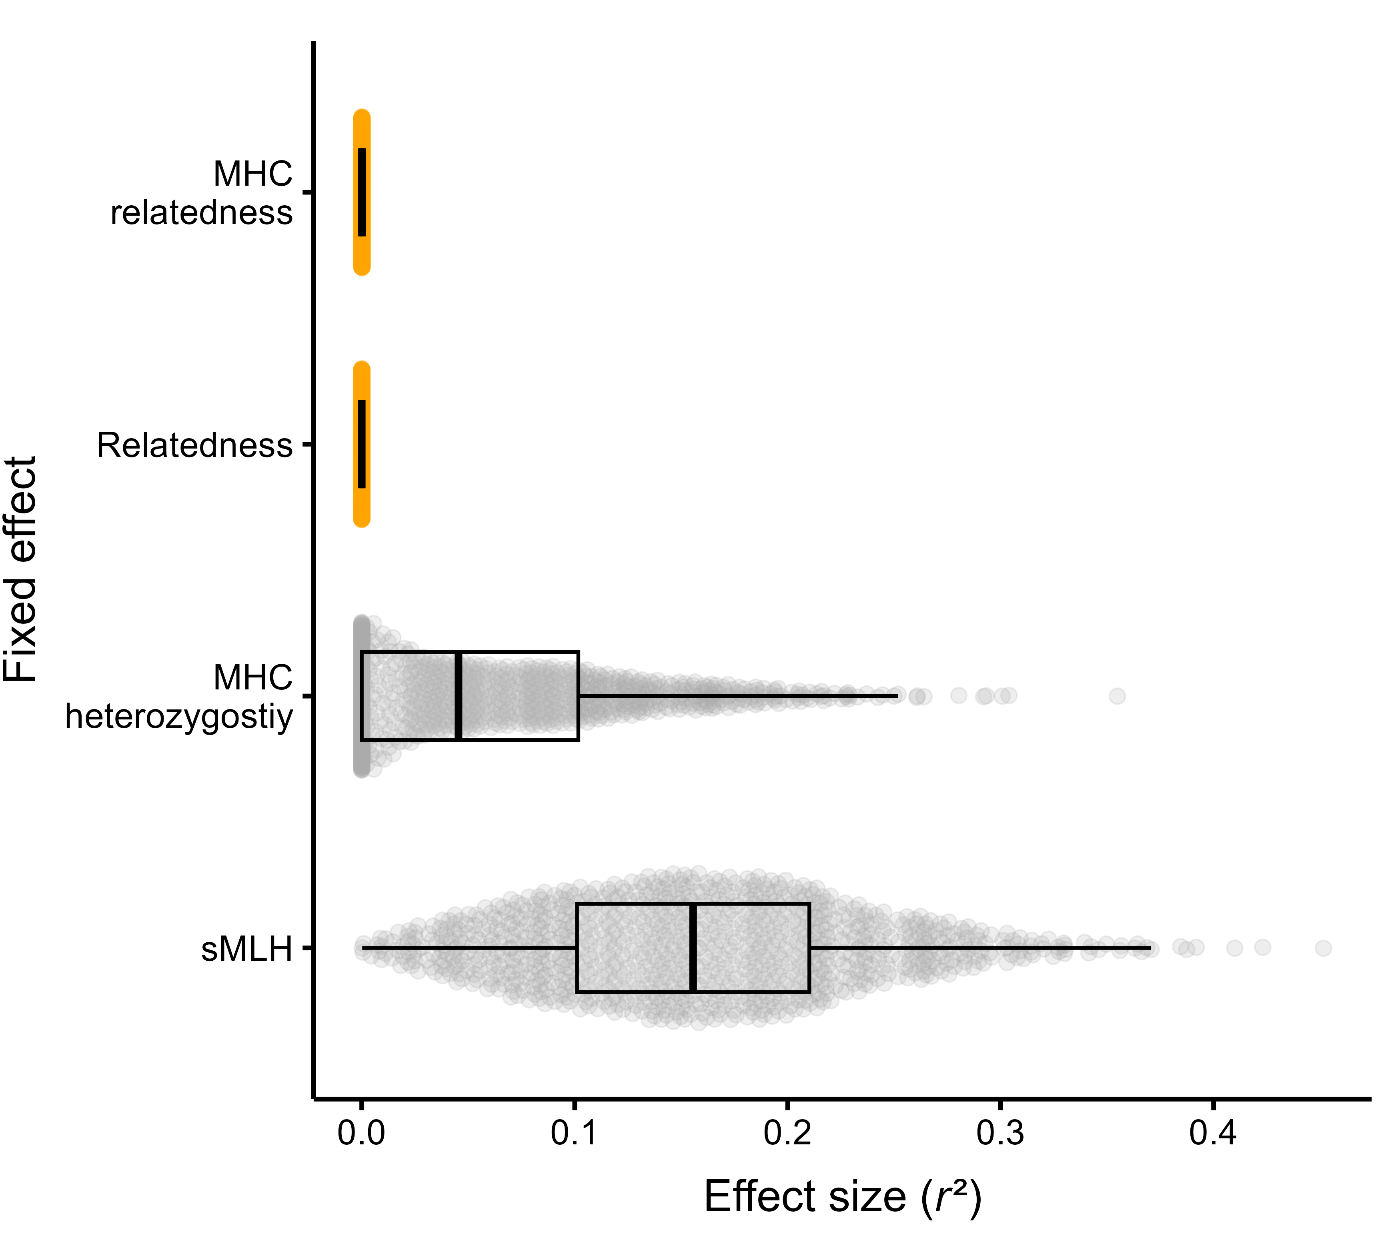


***Tables***

Table 1. The relative performance of alternative models of (a) chemical similarity; and (b) chemical diversity in Antarctic fur seals (see Methods for details). These models differed only in their fixed effects, while the random effects remained the same, as described in the Methods. Multiple model performance criteria are presented together with overall performance scores calculated with the “compare_performance” function in performance [41]. The models with the best overall performance are highlighted with asterisks. *r*2 (cond.), conditional *r*2; *r*2 (marg.), marginal *r*2; ICC, Intraclass correlation coefficient; RMSE, Root-mean-square-error; σ, Residual standard deviation; AIC, Aikake information criterion; BIC, Bayesian information criterion.

| (a) Chemical similarity | | | | | | | | | | |
| --- | --- | --- | --- | --- | --- | --- | --- | --- | --- | --- |
| Model | Main genetic effects | *r*2 (cond.) | *r*2 (marg.) | ICC | RMSE | Sigma | AIC weights | AICc weights | BIC weights | Performance-score |
| a1 | MHC relatedness | 0.691 | 0.137 | 0.642 | 0.060 | 0.062 | 0.199 | 0.198 | 0.025 | 48.06% |
| a2 | Relatedness | 0.686 | 0.140 | 0.635 | 0.060 | 0.062 | 0.208 | 0.207 | 0.027 | 28.70% |
| a3 | MHC relatedness + relatedness | 0.684 | 0.141 | 0.633 | 0.060 | 0.062 | 0.081 | 0.079 | 0.000 | 12.50% |
| a4* | None | 0.693 | 0.137 | 0.644 | 0.060 | 0.062 | 0.512 | 0.515 | 0.947 | 87.50% |
| (b) Chemical diversity | | | | | | | | | | |
| Model | Main genetic effects | *r*2 (cond.) | *r*2 (marg.) | ICC | RMSE | Sigma | AIC weights | AICc weights | BIC weights | Performance-score |
| b1 | MHC heterozygosity | 0.741 | 0.001 | 0.741 | 7.295 | 10.842 | 0.006 | 0.006 | 0.007 | 6.84% |
| b2* | sMLH | 0.768 | 0.115 | 0.738 | 6.731 | 9.987 | 0.710 | 0.754 | 0.830 | 90.84% |
| b3 | MHC heterozygosity + sMLH | 0.746 | 0.113 | 0.735 | 6.742 | 10.117 | 0.269 | 0.220 | 0.114 | 56.44% |
| b4 | None | 0.746 | 0.001 | 0.746 | 7.249 | 10.668 | 0.015 | 0.020 | 0.050 | 19.44% |

***References***

1. Wyatt TD. 2014 *Pheromones and animal behaviour*. 2nd edn. Cambridge: Cambridge University Press.

2. Beauchamp GK, Yamazaki K. 2003 Chemical signalling in mice. *Biochem. Soc. Trans.* **31**, 147–151. (doi:10.1042/bst0310147)

3. Müller C, Caspers BA, Gadau J, Kaiser S. 2020 The Power of infochemicals in mediating individualized niches. *Trends Ecol. Evol.* **35**, 981–989. (doi:10.1016/j.tree.2020.07.001)

4. Waldman B. 1985 Olfactory basis of kin recognition in toad tadpoles. *J. Comp. Physiol. A* **156**, 565–577. (doi:10.1007/BF00619107)

5. Porter RH, Moore JD. 1981 Human kin recognition by olfactory cues. *Physiol. Behav.* **27**, 493–495. (doi:10.1016/0031-9384(81)90337-1)

6. Gerlach G, Hodgins-Davis A, Avolio C, Schunter C. 2008 Kin recognition in zebrafish: a 24-hour window for olfactory imprinting. *Proc. Biol. Sci.* **275**, 2165–2170. (doi:10.1098/rspb.2008.0647)

7. Krause ET, Krüger O, Kohlmeier P, Caspers BA. 2012 Olfactory kin recognition in a songbird. *Biol. Lett.* **8**, 327–329. (doi:10.1098/rsbl.2011.1093)

8. Caspers BA, Hagelin JC, Paul M, Bock S, Willeke S, Krause ET. 2017 Zebra finch hicks recognise parental scent, and retain chemosensory knowledge of their genetic mother,rEven after egg cross-fostering. *Sci. Rep.* **7**. (doi:10.1038/s41598-017-13110-y)

9. Todrank J, Heth G. 2003 Odor–genes covariance and genetic relatedness assessments: Rethinking odor-based “recognition” mechanisms in Rodents. *Adv. Study Behav.* **72**, 77–130.

10. Charlesworth B, Charlesworth D. 1999 The genetic basis of inbreeding depression. *Genet. Res.* **74**, 329–340. (doi:10.1017/S0016672399004152)

11. Hurst JL, Beynon RJ. 2010 Making progress in genetic kin recognition among vertebrates. *J. Biol.* **9**, 13. (doi:10.1186/jbiol221)

12. Stoffel MA, Caspers BA, Forcada J, Giannakara A, Baier M, Eberhart-Phillips L, Müller C, Hoffman JI. 2015 Chemical fingerprints encode mother–offspring similarity, colony membership, relatedness, and genetic quality in fur seals. *Proc. Natl. Acad. Sci.* **112**, E5005–E5012. (doi:10.1073/pnas.1506076112)

13. Szulkin M, Bierne N, David P. 2010 Heterozygosity-fitness correlations: A time for reappraisal. *Evolution* **64**, 1202–1217. (doi:10.1111/j.1558-5646.2010.00966.x)

14. Milinski M. 2006 The major histocompatibility complex, sexual selection, and mate choice. *Annu. Rev. Ecol. Evol. Syst.* **37**, 159–186.

15. Penn DJ, Potts WK. 1999 The evolution of mating preferences and major histocompatibility complex genes. *Am. Nat.* **153**, 145–164. (doi:10.1086/303166)

16. Bernatchez L, Landry C. 2003 MHC studies in nonmodel vertebrates: what have we learned about natural selection in 15 years? *J. Evol. Biol.* **16**, 363–377. (doi:10.1046/j.1420-9101.2003.00531.x)

17. Sommer S. 2005 The importance of immune gene variability (MHC) in evolutionary ecology and conservation. *Front. Zool.* **2**, 16. (doi:10.1186/1742-9994-2-16)

18. Eizaguirre C, Yeates SE, Lenz TL, Kalbe M, Milinski M. 2009 MHC-based mate choice combines good genes and maintenance of MHC polymorphism. *Mol. Ecol.* **18**, 3316–3329. (doi:10.1111/j.1365-294X.2009.04243.x)

19. Wegner KM, Reusch TBH, Kalbe M. 2003 Multiple parasites are driving major histocompatibility complex polymorphism in the wild. *J. Evol. Biol.* **16**, 224–232. (doi:10.1046/j.1420-9101.2003.00519.x)

20. Madsen T, Ujvari B. 2006 MHC class I variation associates with parasite resistance and longevity in tropical pythons. *J. Evol. Biol.* **19**, 1973–1978. (doi:10.1111/j.1420-9101.2006.01158.x)

21. Milinski M. 2022 A review of suggested mechanisms of MHC odor signaling. *Biology* **11**, 1187. (doi:10.3390/biology11081187)

22. Yamazaki K, Beauchamp G, Imai Y, Bard J, Phelan SP, Thomas L, Boyse EA. 1990 Odortypes determined by the major histocompatibility complex in germfree mice. *Proc. Natl. Acadamy Sci.* **87**, 8413–8416.

23. Eggert F, Luszyk D, Haberkorn K, Wobst B, Vostrowsky O, Westphal E, Bestmann HJ, Müller‐ruchholtz W, Ferstl R. 1998 The major histocompatibility complex and the chemosensory signalling of individuality in humans. *Genetica* **104**, 265–273. (doi:10.1023/A:1026431303879)

24. Leclaire S, Strandh M, Dell’Ariccia G, Gabirot M, Westerdahl H, Bonadonna F. 2019 Plumage microbiota covaries with the major histocompatibility complex in blue petrels. *Mol. Ecol.* **28**, 833–846. (doi:10.1111/mec.14993)

25. Schubert N, Nichols HJ, Winternitz JC. 2021 How can the MHC mediate social odor via the microbiota community? A deep dive into mechanisms. *Behav. Ecol.* **32**, 359–373. (doi:10.1093/beheco/arab004)

26. Milinski M. 2021 MHC mediates social odor via microbiota—it cannot work: a comment on Schubert et al. *Behav. Ecol.* **32**, 374–375. (doi:10.1093/beheco/arab017)

27. Santos PSC *et al.* 2016 MHC-dependent mate choice is linked to a trace-amine-associated receptor gene in a mammal. *Sci. Rep.* **6**, 38490. (doi:10.1038/srep38490)

28. Gahr CL, Boehm T, Milinski M. 2018 Female assortative mate choice functionally validates synthesized male odours of evolving stickleback river–lake ecotypes. *Biol. Lett.* **14**, 20180730. (doi:10.1098/rsbl.2018.0730)

29. Grieves LA, Gloor GB, Bernards MA, MacDougall-Shackleton EA. 2021 Preen gland microbiota covary with major histocompatibility complex genotype in a songbird. *R. Soc. Open Sci.* **8**, 210936. (doi:10.1098/rsos.210936)

30. Manning CJ, Wakeland EK, Potts WK. 1992 Communal nesting patterns in mice implicate MHC genes in kin recognition. *Nature* **360**, 581–583. (doi:10.1038/360581a0)

31. Olsén KH, Grahn M, Lohm J, Langefors Å. 1998 MHC and kin discrimination in juvenile Arctic charr,Salvelinus alpinus(L.). *Anim. Behav.* **56**, 319–327. (doi:10.1006/anbe.1998.0837)

32. Mann KD, Turnell ER, Atema J, Gerlach G. 2003 Kin Recognition in Juvenile Zebrafish (Danio rerio) Based on Olfactory Cues. *Biol. Bull.* **205**, 224–225. (doi:10.2307/1543264)

33. Penn DJ. 2002 The Scent of Genetic Compatibility: Sexual selection and the major Histocompatibility Complex. *Ethology* **108**, 1–21.

34. Kwak J, Willse A, Preti G, Yamazaki K, Beauchamp GK. 2010 In search of the chemical basis for MHC odourtypes. *Proc. R. Soc. B Biol. Sci.* **277**, 2417–2425. (doi:10.1098/rspb.2010.0162)

35. Thom MD, Stockley P, Beynon RJ, Hurst JL. 2008 Scent, mate choice and genetic heterozygosity. In *Chemical Signals in Vertebrates 11* (eds JL Hurst, RJ Beynon, SC Roberts, TD Wyatt), pp. 291–301. New York, NY: Springer. (doi:10.1007/978-0-387-73945-8_28)

36. Yamazaki K, Beauchamp GK, Imai Y, Bard J, Phelan SP, Thomas L, Boyse EA. 1990 Odor types determined by the major histocompatibility complex in germfree mice. *Proc. Natl. Acad. Sci.* **87**, 8413–8416. (doi:10.1073/pnas.87.21.8413)

37. Schaefer ML, Yamazaki K, Osada K, Restrepo D, Beauchamp GK. 2002 Olfactory fingerprints for major histocompatibility complex-determined body odors II: Relationship among odor maps, genetics, odor composition, and behavior. *J. Neurosci.* **22**, 9513–9521. (doi:10.1523/JNEUROSCI.22-21-09513.2002)

38. Yamazaki K, Beauchamp GK, Curran M, Bard J, Boyse EA. 2000 Parent–progeny recognition as a function of MHC odortype identity. *Proc. Natl. Acad. Sci.* **97**, 10500–10502. (doi:10.1073/pnas.180320997)

39. Willse A, Kwak J, Yamazaki K, Preti G, Wahl JH, Beauchamp GK. 2006 Individual odortypes: interaction of MHC and background genes. *Immunogenetics* **58**, 967–982. (doi:10.1007/s00251-006-0162-x)

40. Park JY *et al.* 2018 Deciphering the evolutionary signatures of pinnipeds using novel genome sequences: The first genomes of *Phoca largha*, *Callorhinus ursinus*, and *Eumetopias jubatus*. *Sci. Rep.* **8**, 16877. (doi:10.1038/s41598-018-34758-0)

41. Kowalewsky S, Dambach M, Mauck B, Dehnhardt G. 2006 High olfactory sensitivity for dimethyl sulphide in harbour seals. *Biol. Lett.* **2**, 106–109. (doi:10.1098/rsbl.2005.0380)

42. Hamilton JE. 1956 Scent of Otariids. *Nature* **177**, 900.

43. Ling JK. 1974 The integument of marine mammals. In *Functional anatomy of marine mammals*, pp. 1–44. London: Academic Press.

44. Hardy MH, Roff E, Smith TG, Ryg M. 1991 Facial skin glands of ringed and grey seals, and their possible function as odoriferous organs. *Can. J. Zool.* **69**, 189–200. (doi:10.1139/z91-029)

45. Dobson FS, Jouventin P. 2003 How mothers find their pups in a colony of Antarctic fur seals. *Behav. Processes* **61**, 77–85. (doi:10.1016/S0376-6357(02)00164-X)

46. Phillips AV. 2003 Behavioral cues used in reunions between mother and pup South American fur seals (*Arctocephalus australis*). *J. Mammal.* **84**, 524–535. (doi:10.1644/1545-1542(2003)084<0524:BCUIRB>2.0.CO;2)

47. Tebbe J, Humble E, Stoffel MA, Tewes LJ, Müller C, Forcada J, Caspers B, Hoffman JI. 2020 Chemical patterns of colony membership and mother-offspring similarity in Antarctic fur seals are reproducible. *PeerJ* **8**, e10131. (doi:10.7717/peerj.10131)

48. Tebbe J, Ottensmann M, Havenstein K, Efstratiou A, Lenz T, Caspers B, Forcada J, Tiedemann R, Hoffman JI. 2022 Intronic primers uncover unexpectedly high major histocompatibility complex diversity in Antarctic fur seals. *Sci. Rep.* **12**. (doi:10.1038/s41598-022-17933-1)

49. de Assunção-Franco M, Hoffman JI, Harwood J, Amos W. 2012 MHC genotype and near-deterministic mortality in grey seals. *Sci. Rep.* **2**, 659. (doi:10.1038/srep00659)

50. Lenz TL, Mueller B, Trillmich F, Wolf JBW. 2013 Divergent allele advantage at MHC-DRB through direct and maternal genotypic effects and its consequences for allele pool composition and mating. *Proc. R. Soc. B Biol. Sci.* **280**, 20130714. (doi:10.1098/rspb.2013.0714)

51. Acevedo-Whitehouse K, Gulland FMD, Bowen L. 2018 MHC class II DRB diversity predicts antigen recognition and is associated with disease severity in California sea lions naturally infected with *Leptospira interrogans*. *Infect. Genet. Evol.* **57**, 158–165. (doi:10.1016/j.meegid.2017.11.023)

52. Nagel R, Stainfield C, Fox-Clarke C, Toscani C, Forcada J, Hoffman JI. 2021 Evidence for an allee rffect in a declining fur seal population. *Proc. R. Soc. B Biol. Sci.* **288**. (doi:10.1098/rspb.2020.2882)

53. Hoffman JI, Boyd IL, Amos W. 2003 Male reproductive strategy and the importance of maternal status in the Antarctic fur seal *Arctocephalus gazella*. *Evolution* **57**, 1917–1930. (doi:10.1111/j.0014-3820.2003.tb00598.x)

54. Ottensmann M, Stoffel MA, Nichols HJ, Hoffman JI. 2018 GCalignR: An R package for aligning gas-chromatography data for ecological and evolutionary studies. *PLOS ONE* **13**, e0198311. (doi:10.1371/journal.pone.0198311)

55. Oksanen J *et al.* 2022 vegan: Community Ecology Package. *Vegan Community Ecol. Package R Package Version 26-2*

56. Stoffel MA, Esser M, Kardos M, Humble E, Nichols H, David P, Hoffman JI. 2016 inbreedR: An R package for the analysis of inbreeding based on genetic markers. *Methods Ecol. Evol.* (doi:10.1111/2041-210X.12588)

57. Kraemer P, Gerlach G. 2017 Demerelate: Functions to calculate relatedness on diploid genetic data. *Demerelate Funct. Calc. Relatedness Diploid Genet. Data R Package Version 09-3*

58. McMurdie PJ, Holmes S. 2013 phyloseq: An R package for reproducible interactive analysis and graphics of microbiome census data. *PLoS ONE* **8**, e61217.

59. R Core Team. 2022 *R: A language and environment for statistical computing*. See https://www.R-project.org/.

60. Lüdecke D, Ben-Shachar M, Patil I, Waggoner P, Makowski D. 2021 performance: An R package for assessment, comparison and testing of statistical models. *J. Open Source Softw.* **6**, 3139.

61. Barton K. 2020 *MuMIn: Multi-Model Inference*. See https://CRAN.R-project.org/package=MuMIn.

62. Stoffel MA, Nakagawa S, Schielzeth H. 2020 partR2: Partitioning R2 in generalized linear mixed models. *bioRxiv* (doi:10.1101/2020.07.26.221168)

63. Wedekind C, Füri S. 1997 Body odour preferences in men and women: do they aim for specific MHC combinations or simply heterozygosity? *Proc. R. Soc. Lond. B Biol. Sci.* **264**, 1471–1479. (doi:10.1098/rspb.1997.0204)

64. Leclaire S, Strandh M, Mardon J, Westerdahl H, Bonadonna F. 2017 Odour-based discrimination of similarity at the major histocompatibility complex in birds. *Proc. R. Soc. B Biol. Sci.* **284**, 20162466. (doi:10.1098/rspb.2016.2466)

65. Novotny MV, Soini HA, Koyama S, Wiesler D, Bruce KE, Penn DJ. 2007 Chemical identification of MHC-influenced volatile compounds in mouse urine. I: Quantitative proportions of major chemosignals. *J. Chem. Ecol.* **33**, 417–434. (doi:10.1007/s10886-006-9230-9)

66. Grosser S, Sauer J, Paijmans AJ, Caspers BA, Forcada J, Wolf JBW, Hoffman JI. 2019 Fur seal microbiota are shaped by the social and physical environment, show mother–offspring similarities and are associated with host genetic quality. *Mol. Ecol.* **28**, 2406–2422. (doi:10.1111/mec.15070)

67. Jennings SL, Hoover BA, Wa Sin SY, Ebeler SE. 2022 Feather chemicals contain information about the major histocompatibility complex in a highly scented seabird. *Proc. R. Soc. B Biol. Sci.* **289**, 20220567. (doi:10.1098/rspb.2022.0567)

68. Setchell JM, Vaglio S, Abbott KM, Moggi-Cecchi J, Boscaro F, Pieraccini G, Knapp LA. 2011 Odour signals major histocompatibility complex genotype in an Old World monkey. *Proc. R. Soc. B Biol. Sci.* **278**, 274–280. (doi:10.1098/rspb.2010.0571)

69. Slade JWG, Watson MJ, Kelly TR, Gloor GB, Bernards MA, MacDougall-Shackleton EA. 2016 Chemical composition of preen wax reflects major histocompatibility complex similarity in songbirds. *Proc. R. Soc. B Biol. Sci.* **283**, 20161966. (doi:10.1098/rspb.2016.1966)

70. Grogan KE, Harris RL, Boulet M, Drea CM. 2019 Genetic variation at MHC class II loci influences both olfactory signals and scent discrimination in ring-tailed lemurs. *BMC Evol. Biol.* **19**, 171. (doi:10.1186/s12862-019-1486-0)

71. Leclaire S, van Dongen WFD, Voccia S, Merkling T, Ducamp C, Hatch SA, Blanchard P, Danchin É, Wagner RH. 2014 Preen secretions encode information on MHC similarity in certain sex-dyads in a monogamous seabird. *Sci. Rep.* **4**, 6920. (doi:10.1038/srep06920)

72. Roberts SC, Hale ML, Petrie M. 2006 Correlations between heterozygosity and measures of genetic similarity: implications for understanding mate choice. *J. Evol. Biol.* **19**, 558–569. (doi:10.1111/j.1420-9101.2005.01003.x)

73. Forcada J, Hoffman JI. 2014 Climate change selects for heterozygosity in a declining fur seal population. *Nature* **511**, 462–465. (doi:10.1038/nature13542)

74. Paijmans AJ *et al.* 2020 The genetic legacy of extreme exploitation in a polar vertebrate. *Sci. Rep.* **10**, 5089. (doi:10.1038/s41598-020-61560-8)

75. Hoffman JI, Chen RS, Vendrami DLJ, Paijmans AJ, Dasmahapatra KK, Forcada J. 2022 Demographic reconstruction of Antarctic fur seals supports the krill surplus hypothesis. *Genes* **13**, 541. (doi:10.3390/genes13030541)

76. Stoffel MA *et al.* 2018 Demographic histories and genetic diversity across pinnipeds are shaped by human exploitation, ecology and life-history. *Nat. Commun.* **9**, 4836. (doi:10.1038/s41467-018-06695-z)

77. Hoffman JosephI, Boyd IL, Amos W. 2004 Exploring the relationship between parental relatedness and male reproductive success in the Antarctic fur seal *Arctocephalus Gazella*. *Evolution* **58**, 2087–2099. (doi:10.1111/j.0014-3820.2004.tb00492.x)

78. Hoffman JI, Forcada J, Trathan PN, Amos W. 2007 Female fur seals show active choice for males that are heterozygous and unrelated. *Nature* **445**, 912–914. (doi:10.1038/nature05558)

79. Hoffman JI, Hanson N, Forcada J, Trathan PN, Amos W. 2010 Getting long in the tooth: A strong positive correlation between canine size and heterozygosity in Antarctic Fur seals *Arctocephalus gazella*. *J. Hered.* **101**, 527–538. (doi:10.1093/jhered/esq045)

80. Kristensen TN, Sørensen P, Kruhøffer M, Pedersen KS, Loeschcke V. 2005 Genome-wide analysis on inbreeding effects on gene expression in *Drosophila melanogaster*. *Genetics* **171**, 157–167. (doi:10.1534/genetics.104.039610)

81. Menzel M, Sletvold N, Ågren J, Hansson B. 2015 Inbreeding affects gene expression differently in two self-incompatible *Arabidopsis lyrata* populations with similar levels of inbreeding depression. *Mol. Biol. Evol.* **32**, 2036–2047. (doi:10.1093/molbev/msv086)

82. Foster KR, Schluter J, Coyte KZ, Rakoff-Nahoum S. 2017 The evolution of the host microbiome as an ecosystem on a leash. *Nature* **548**, 43–51. (doi:10.1038/nature23292)

83. Radwan J, Babik W, Kaufman J, Lenz TL, Winternitz J. 2020 Advances in the evolutionary understanding of MHC polymorphism. *Trends Genet.* **36**, 298–311. (doi:10.1016/j.tig.2020.01.008)

84. Albone ES, Eglinton G, Walker JM, Ware GC. 1974 The anal sac secretion of the red fox (*Vulpes vulpes*); its chemistry and microbiology. A comparison with the anal sac secretion of the lion (*Panthera leo*). *Life Sci.* **14**, 387–400. (doi:10.1016/0024-3205(74)90069-1)

85. Gorman ML. 1976 A mechanism for individual recognition by odour in *Herpestes auropunctatus* (*Carnivora: Viverridae*). *Anim. Behav.* **24**, 141–145. (doi:10.1016/S0003-3472(76)80107-8)

86. Cammen K, Hoffman JI, Knapp LA, Harwood J, Amos W. 2011 Geographic variation of the major histocompatibility complex in Eastern Atlantic grey seals (*Halichoerus grypus*). *Mol. Ecol.* **20**, 740–752. (doi:10.1111/j.1365-294X.2010.04975.x)

87. Ottensmann M. 2018 *Balancing selection and trans-specific polymorphism explain high MHC class II diversity in Antarctic fur seals.* Bielefeld: Bielefeld University Press.

88. Steidl RJ, Hayes JP, Schauber E. 1997 Statistical power analysis in wildlife research. *J. Wildl. Manag.* **61**, 270–279. (doi:10.2307/3802582)

89. Hoenig JM, Heisey DM. 2001 The abuse of power. *Am. Stat.* **55**, 19–24. (doi:10.1198/000313001300339897)

90. Levine M, Ensom MHH. 2001 Post hoc power analysis: An idea whose time has passed? *Pharmacother. J. Hum. Pharmacol. Drug Ther.* **21**, 405–409. (doi:10.1592/phco.21.5.405.34503)

91. Colegrave N, Ruxton GD. 2003 Confidence intervals are a more useful complement to nonsignificant tests than are power calculations. *Behav. Ecol.* **14**, 446–447. (doi:10.1093/beheco/14.3.446)

92. Boyd IL, Lunn NJ, Barton T. 1991 Time budgets and foraging characteristics of lactating Antarctic fur seals. *J. Anim. Ecol.* **60**, 577–592. (doi:10.2307/5299)

93. Hoffman JI, Trathan PN, Amos W. 2006 Genetic tagging reveals extreme site fidelity in territorial male Antarctic fur seals *Arctocephalus gazella*. *Mol. Ecol.* **15**, 3841–3847. (doi:10.1111/j.1365-294X.2006.03053.x)

94. Nagel R, Mews S, Adam T, Stainfield C, Fox-Clarke C, Toscani C, Langrock R, Forcada J, Hoffman JI. 2021 Movement patterns and activity levels are shaped by the neonatal environment in Antarctic fur seal pups. *Sci. Rep.* **11**, 14323. (doi:10.1038/s41598-021-93253-1)

95. Irving L, Peyton LJ, Bahn CH, Peterson RS. 1962 Regulation of temperature in fur seals. *Physiol. Zool.* **35**, 275–284. (doi:10.1086/physzool.35.4.30155424)

96. Hoffman JI, Simpson F, David P, Rijks JM, Kuiken T, Thorne MAS, Lacy RC, Dasmahapatra KK. 2014 High-throughput sequencing reveals inbreeding depression in a natural population. *Proc. Natl. Acad. Sci.* **111**, 3775–3780. (doi:10.1073/pnas.1318945111)
